## MicroRNA profiling associated with non-small cell lung cancer: next generation sequencing detection, experimental validation, and prognostic value

Sandra Gallach<sup>1,2</sup>, Eloisa Jantus-Lewintre<sup>1,2,3</sup>, Silvia Calabuig-Fariñas<sup>1,2,4</sup>, David Montaner<sup>5</sup>, Sergio Alonso<sup>6</sup>, Rafael Sirera<sup>2,3</sup>, Ana Blasco<sup>2,7</sup>, Marta Usó<sup>1</sup>, Ricardo Guijarro<sup>8,9</sup>, Miguel Martorell<sup>4,10</sup> and Carlos Camps<sup>1,2,7,11</sup>

<sup>1</sup> Molecular Oncology Laboratory, Fundación Investigación, Hospital General Universitario de Valencia, Valencia, Spain

<sup>2</sup> Centro de Investigación Biomédica en Red de Cáncer (CIBERONc), Madrid, Spain

<sup>3</sup> Department of Biotechnology, Universitat Politècnica de València, Valencia, Spain

<sup>4</sup> Department of Pathology, Universitat de València, Valencia, Spain

<sup>5</sup> Department of Computational Genomics, Centro de Investigación Príncipe Felipe, Valencia, Spain

<sup>6</sup> Program of Predictive and Personalized Medicine of Cancer, Institut de Reserca Germans Trias i Pujol (PMPPC-IGTP), Badalona, Spain

<sup>7</sup> Department of Medical Oncology, Hospital General Universitario de Valencia, Valencia, Spain

<sup>8</sup> Department of Surgery, Universitat de València, Valencia, Spain

<sup>9</sup> Department of Thoracic Surgery, Hospital General Universitario de Valencia, Valencia, Spain

<sup>10</sup> Department of Pathology, Hospital General Universitario de Valencia, Valencia, Spain

<sup>11</sup> Department of Medicine, Universitat de València, Valencia, Spain

**Correspondence to:** Eloisa Jantus-Lewintre, **email:** jantus\_elo@gva.es

Carlos Camps, **email:** camps\_car@gva.es

**Keywords:** microRNAs, NSCLC, NGS, profiling, prognosis

**Received:** May 09, 2017

**Accepted:** June 09, 2017

**Published:** June 22, 2017

Copyright: Gallach et al. This is an open-access article distributed under the terms of the Creative Commons Attribution License 3.0 (CC BY 3.0), which permits unrestricted use, distribution, and reproduction in any medium, provided the original author and source are credited.

### ABSTRACT

**Background:** The average five-year survival for non-small cell lung cancer (NSCLC) patients is approximately 15%. Emerging evidence indicates that microRNAs (miRNAs) constitute a new class of gene regulators in humans that may play an important role in tumorigenesis. Hence, there is growing interest in studying their role as possible new biomarkers whose expression is aberrant in cancer. Therefore, in this study we identified dysregulated miRNAs by next generation sequencing (NGS) and analyzed their prognostic value.

**Methods:** Sequencing by oligo ligation detection technology was used to identify dysregulated miRNAs in a training cohort comprising paired tumor/normal tissue samples ( $N = 32$ ). We validated 22 randomly selected differentially-expressed miRNAs by quantitative real time PCR in tumor and adjacent normal tissue samples ( $N = 178$ ). Kaplan-Meier survival analysis and Cox regression were used in multivariate analysis to identify independent prognostic biomarkers.

**Results:** NGS analysis revealed that 39 miRNAs were dysregulated in NSCLC: 28 were upregulated and 11 were downregulated. Twenty-two miRNAs were validated in an independent cohort. Interestingly, the group of patients with high expression of both miRNAs (miR-21<sup>high</sup> and miR-188<sup>high</sup>) showed shorter relapse-free survival (RFS) and overall survival (OS) times. Multivariate analysis confirmed that this combined signature is an independent prognostic marker for RFS and OS ( $p = 0.001$  and  $p < 0.0001$ , respectively).

**Conclusions: NGS technology can specifically identify dysregulated miRNA profiles in resectable NSCLC samples. MiR-21 or miR-188 overexpression correlated with a negative prognosis, and their combined signature may represent a new independent prognostic biomarker for RFS and OS.**

## INTRODUCTION

Lung cancer is the leading cause of death from cancer worldwide, with an incidence of more than a million of cases annually [1]. Even though outcomes for patients at all lung cancer stages have improved in recent years, its survival rate remains very poor [2, 3]. Surgery is the only potentially curative treatment for early-stage non-small cell lung cancer (NSCLC) patients. However, there are also many cases that remain uncured following surgery. In fact, 30% to 55% of patients with NSCLC relapse and die from their disease despite curative resection [4, 5]. Hence, there is an urgent need for new biomarkers for this disease which can be used in clinical practice, and accordingly, more studies are also required to identify and validate these new prognostic and diagnostic biomarkers in lung cancer [6-8].

MicroRNAs (miRNAs) are a class of small highly-conserved, non-coding RNAs that were discovered in the early 1990s, and are approximately 18-25 nucleotides long [9-12]. These molecules are important post-transcriptional gene expression regulators related to fundamental processes such as cellular proliferation, differentiation, development, and apoptosis [13]. Altered miRNA levels have been described in several pathologies, including cancer [14-17], and several different studies have suggested that miRNAs could be useful as diagnostic and prognostic biomarkers in lung cancer [18-20]. Additionally, microRNAs have also involved in resistance to chemotherapy and novel targeted agents in non-small cell lung cancer [21]. Furthermore, emerging technologies such as next generation sequencing (NGS) have shown great potential as a platform for small RNA analysis and its use is now being extended to find novel cancer biomarkers.

Therefore, in the context of the above, the aim of this study was to analyze the miRNAome using NGS to characterize dysregulated miRNAs in a large cohort of resectable NSCLC patients, in order to establish expression profiles associated with prognosis in this disease, thus allowing patients with highest risk of relapse to be distinguished.

## RESULTS

The main clinicopathological characteristics of the training ( $N = 32$  patients) and validation ( $N = 178$  patients) sets including age, gender, stage of disease, and histology are summarized in Table 1. The median follow-up was 81.2 [0.5-110] and 81.2 [1-113] months for training and validation sets, respectively.

## Differential microRNA expression by NGS

Annotation analyses of small RNA biotypes revealed that 88.62% of the small RNAs found were miRNAs. Furthermore, when miRNA annotation was analysed, 940 mature miRNAs had expression in one sample at least. Differential expression analysis was performed to this universe of 940 miRNAs. Analysis of principal components revealed to have two differentiated sample groups in our training cohort corresponding to tumoral and normal samples.

39 miRNAs were dysregulated in tumor compared to normal samples: 28 were upregulated and 11 downregulated (Table 2). However, differentially-expressed miRNAs were not found when we compared these data with clinicopathological variables. Supervised hierarchical clustering analysis of these differentially-expressed miRNAs revealed two groups of accurately-defined samples (normal and tumor tissues) according to their miRNA expression profile (Figure 1).

## Functional analyses

*In silico* functional studies, based on computational analyses from 39 miRNA found dysregulated in this study, showed several biological processes (bp) of GO terms significantly related to lung, such as, respiratory system development, lung development, respiratory tube development, which seems to indicate that these differentially expressed miRNAs could be tissue specific. Furthermore, response to growth factor stimulus and cellular response to growth factor stimulus GO terms were found enriched in this analysis. This fact is in concordance with the increase in cellular growth during carcinogenesis (Table 3). In addition, functional analyses were performed with the prognostic value miRNAs (miR-21 and miR-188), where target gene enrichments were carry out. Analyses showed an elevated number of target genes for both miRNAs related to essential pathways in carcinogenesis process (Supplemental Figure 1).

## MicroRNA expression validation

From the 39 differentially-expressed miRNAs, seven presented an average of fewer than 30 counts and so were excluded from the validation analysis. Twenty-two miRNAs were randomly selected for validation in an independent cohort of patients ( $N = 178$ ). The Wilcoxon signed-rank test, confirmed that there were statistically

significant differences in the expression of these miRNAs between tumor and normal adjacent lung tissue with the exception of miR-125a (Table 2A-2B).

### Prognostic value of microRNAs

Of the 22 miRNAs analyzed, only miR-21-5p and miR-188-5p had any prognostic value: higher expression of these miRNAs was significantly correlated with shorter RFS (24.03 vs. 56.83 months,  $p = 0.042$  and 23.67 vs. 66.97 months,  $p = 0.009$ , respectively) and OS (42.60 vs. 82.60 months,  $p = 0.043$  and 42.90 vs. 81.23 months,  $p = 0.002$ , respectively) (Table 4, Figure 2A-2B). According to these results, and in order to better assess the prognosis of patients, we also considered the combination of these two microRNAs. Interestingly, patients with high expression of both miRNAs (miR-21<sup>high</sup> and miR-188<sup>high</sup>) had shorter RFS and OS times ( $p = 0.006$  and  $p = 0.0006$ , respectively) (Table 4, Figure 2C).

### Multivariate Cox regression analysis

To determine which analyzed variables had an independent impact on the lung cancer prognosis in our cohort, we performed multivariate analysis. The Clinical and experimental variables included were all those that were statistically significant in the univariate analysis. *KRAS* status was an independent prognostic variable for RFS according to the Cox regression model ( $p = 0.020$ ) and the signature (miR-21<sup>high</sup> and miR-188<sup>high</sup>) was an independent poor prognostic biomarker for RFS ( $p = 0.001$ ) and OS ( $p < 0.0001$ ) (Table 4).

### Prognostic signature validation

Data from TCGA for squamous lung cancer (LUSC) and lung adenocarcinoma (LUAD) patients was used for *in silico* validation of the miRNA signature.

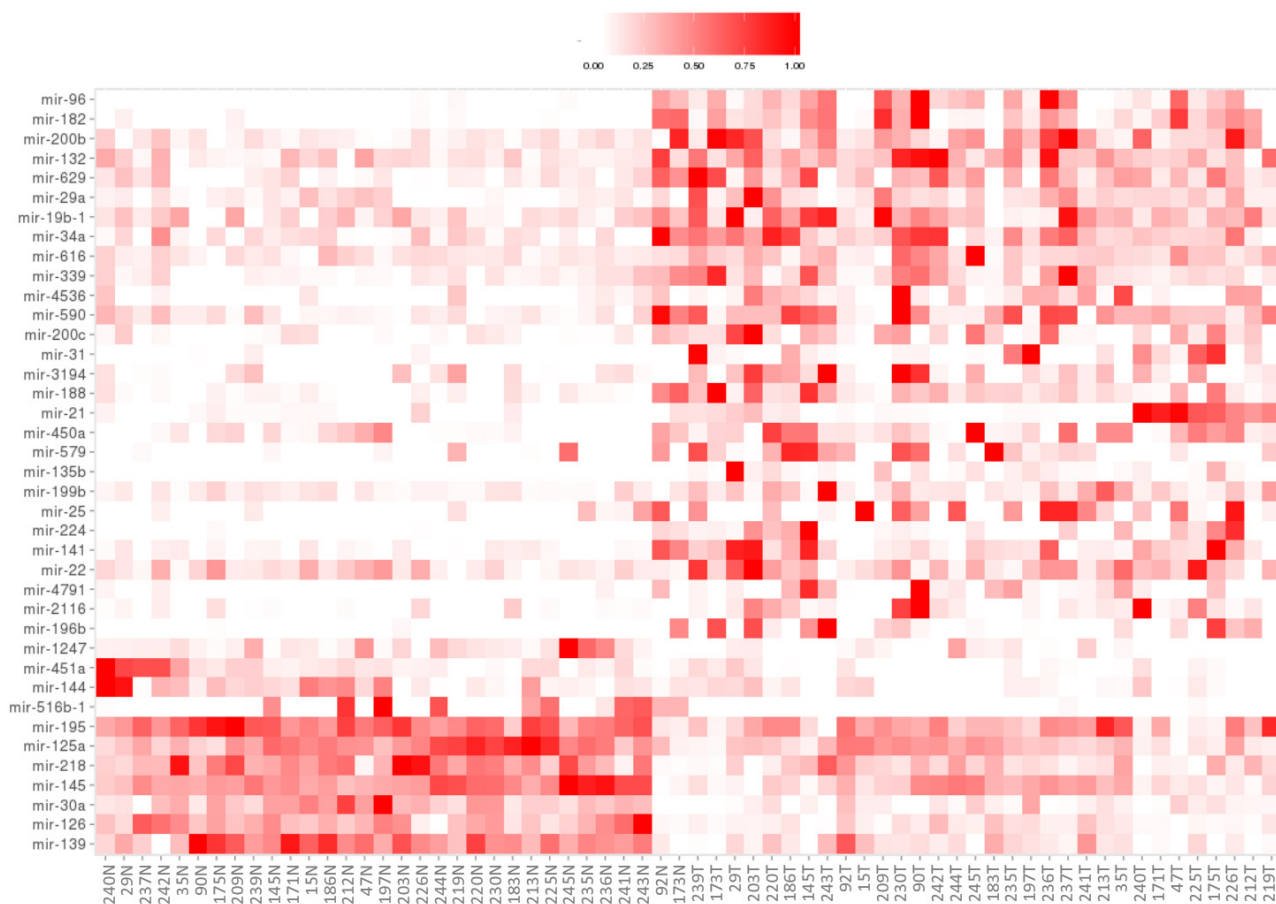

**Figure 1: Supervised hierarchical clustering analysis of differentially-expressed miRNAs.** The level of miRNA expression is color-coded by intensity: white squares represents lower miRNA expression and red squares higher expression in tumor tissue compared with adjacent normal tissue

**Table 1: Clinicopathological characteristics of the patients**

|                                        | Training set |      | Validation set |      | In silico set |      |
|----------------------------------------|--------------|------|----------------|------|---------------|------|
|                                        | N= 32        | %    | N=178          | %    | N=618         | %    |
| <b>Age at surgery</b> (median, range): | 64 [47-82]   |      | 65 [26-85]     |      | 68 [38-88]    |      |
| <b>Gender</b>                          |              |      |                |      |               |      |
| Male                                   | 26           | 81.2 | 154            | 85.5 | 352           | 56.9 |
| Female                                 | 6            | 18.8 | 24             | 13.5 | 266           | 43.1 |
| <b>Stage</b> <sup>(a)</sup>            |              |      |                |      |               |      |
| I                                      | 17           | 53.1 | 105            | 59   | 350           | 56.6 |
| II                                     | 6            | 18.8 | 35             | 19.7 | 178           | 28.8 |
| IIIA                                   | 9            | 28.1 | 38             | 21.3 | 90            | 14.6 |
| <b>Histology</b>                       |              |      |                |      |               |      |
| SCC                                    | 13           | 40.6 | 84             | 47.2 | 279           | 45.1 |
| ADC                                    | 19           | 59.4 | 74             | 41.6 | 339           | 54.9 |
| Others                                 |              |      | 20             | 11.2 |               |      |
| <b>Performance Status</b>              |              |      |                |      |               |      |
| 0                                      | 22           | 68.8 | 118            | 66.3 | NS            | NS   |
| 1-2                                    | 10           | 31.2 | 60             | 33.7 |               |      |
| <b>Differentiation grade</b>           |              |      |                |      |               |      |
| Poor                                   | 10           | 31.2 | 43             | 24.2 | NS            | NS   |
| Moderate                               | 12           | 37.5 | 77             | 43.2 |               |      |
| Well                                   | 7            | 21.9 | 31             | 17.4 |               |      |
| NS                                     | 3            | 9.4  | 27             | 15.2 |               |      |
| <b>Smoking Status</b>                  |              |      |                |      |               |      |
| Current                                | 16           | 50   | 86             | 48.3 | NS            | NS   |
| Former                                 | 8            | 25   | 72             | 40.5 |               |      |
| Never                                  | 8            | 25   | 20             | 11.2 |               |      |
| <b>Relapse</b>                         |              |      |                |      |               |      |
| No                                     | 20           | 62.5 | 98             | 55.1 | 373           | 60.4 |
| Yes                                    | 12           | 37.5 | 80             | 44.9 | 33            | 5.3  |
| NS                                     |              |      |                |      | 212           | 34.3 |
| <b>Dead</b>                            |              |      |                |      |               |      |
| No                                     | 19           | 59.4 | 102            | 57.3 | 462           | 74.8 |
| Yes                                    | 13           | 40.6 | 76             | 42.7 | 156           | 25.2 |

ADC, adenocarcinoma; SCC, squamous cell carcinoma; NS, non-specified.

<sup>(a)</sup> According to the American Joint Committee on Cancer staging manual (TNM 6).

Clinicopathological characteristics of these patients are summarized in Table 1. The analyses confirmed that both miR-21 and miR-188 were significantly overexpressed in tumor tissues ( $p < 0.0001$ ). Patients with post-surgical complications were excluded from the survival analysis, and only those patients who had at least 1 month of follow up were included ( $N = 496$ ). Analysis revealed a poor prognosis for OS in patients with high levels of miR-21 (37.86 vs 59.66 months,  $p = 0.020$ ) (Figure 2D); however miR-188 did not show prognostic value in the group of TCGA patients. RFS analysis was not carried out as the data for disease status was not specified in many of the patients.

## DISCUSSION

MicroRNAs have been shown to play an important role in the tumorigenesis and development of NSCLC. However, few studies characterize the profiles of miRNAs in paired tumor and adjacent normal tissue samples at the same time. In our study, the microRNAome was assessed in a large cohort (training set = 32 and validation set = 178, respectively) of resectable NSCLC patients, who long-term follow-ups were available, thus strengthening the analysis. Additionally, this study presents the useful application of deep next generation sequencing technology for profiling miRNAs in resectable lung tumor specimens. Some similar studies have been performed using different microarray platforms [22, 23], ours being one of the first to

**Table 2: MicroRNAs dysregulated in tumor samples compared to normal samples and Wilcoxon test results for validated microRNAs.**

| <b>A) MicroRNAs upregulated</b>   |             |           |                |               |                |
|-----------------------------------|-------------|-----------|----------------|---------------|----------------|
| <b>Name</b>                       | <b>NGS</b>  |           |                |               | <b>RTqPCR</b>  |
|                                   | <b>stat</b> | <b>FC</b> | <b>p-value</b> | <b>p-adj§</b> | <b>p-value</b> |
| miR-96                            | 4.750       | 5,85      | 0              | 0             |                |
| miR-182*                          | 3.921       | 3,70      | 0              | 0.009         | <0.001         |
| miR-200b                          | 3.882       | 2,56      | 0              | 0.010         |                |
| miR-132                           | 3.830       | 2,08      | 0              | 0.011         |                |
| miR-629                           | 3.671       | 2,31      | 0              | 0.019         |                |
| miR-29a*                          | 3.624       | 2,30      | 0              | 0.020         | <0.001         |
| miR-19b-1*                        | 3.615       | 2,10      | 0              | 0.020         | <0.001         |
| miR-34a*                          | 3.499       | 2,20      | 0              | 0.026         | <0.001         |
| miR-616                           | 3.465       | 1,83      | 0.001          | 0.026         |                |
| miR-339*                          | 3.394       | 2,26      | 0.001          | 0.029         | <0.001         |
| miR-4536                          | 3.389       | 4,00      | 0.001          | 0.029         |                |
| miR-590*                          | 3.376       | 2,12      | 0.001          | 0.029         | <0.001         |
| miR-200c                          | 3.375       | 2,93      | 0.001          | 0.029         |                |
| miR-31*                           | 3.366       | 8,99      | 0.001          | 0.029         | <0.001         |
| miR-3194                          | 3.360       | 3,45      | 0.001          | 0.029         |                |
| miR-188*                          | 3.340       | 2,54      | 0.001          | 0.030         | <0.001         |
| miR-21*                           | 3.301       | 4,85      | 0.001          | 0.034         | <0.001         |
| miR-450a                          | 3.243       | 2,42      | 0.001          | 0.039         |                |
| miR-579                           | 3.235       | 4,37      | 0.001          | 0.039         |                |
| miR-135b*                         | 3.206       | 6,63      | 0.001          | 0.042         | <0.001         |
| miR-199b*                         | 3.180       | 2,05      | 0.001          | 0.043         | <0.001         |
| miR-25                            | 3.164       | 4,34      | 0.002          | 0.043         |                |
| miR-224                           | 3.160       | 5,59      | 0.002          | 0.043         | <0.001         |
| miR-141                           | 3.158       | 2,72      | 0.002          | 0.043         |                |
| miR-22                            | 3.153       | 1,84      | 0.002          | 0.043         |                |
| miR-4791                          | 3.115       | 7,24      | 0.002          | 0.046         |                |
| miR-2116                          | 3.108       | 4,11      | 0.002          | 0.046         |                |
| miR-196b*                         | 3.055       | 7,03      | 0.002          | 0.050         | <0.001         |
| <b>B) MicroRNAs downregulated</b> |             |           |                |               |                |
| <b>Name</b>                       | <b>NGS</b>  |           |                |               | <b>RTqPCR</b>  |
|                                   | <b>stat</b> | <b>FC</b> | <b>p-value</b> | <b>p-adj§</b> | <b>p-value</b> |
| miR-1247                          | -3.144      | -2,89     | 0.002          | 0.043         |                |
| miR-451a*                         | -3.466      | -3,43     | 0.001          | 0.026         | <0.001         |
| miR-144*                          | -3.494      | -2,84     | 0              | 0.026         | <0.001         |
| miR-516b-1                        | -3.535      | -43,319   | 0              | 0.025         |                |
| miR-195*                          | -3.927      | -1,57     | 0              | 0.009         | 0.039          |
| miR-125a*                         | -4.392      | -1,78     | 0              | 0.002         | 0.679          |
| miR-218*                          | -4.467      | -2,06     | 0              | 0.001         | <0.001         |
| miR-145*                          | -4.778      | -1,89     | 0              | 0             | 0.001          |
| miR-30a*                          | -5.141      | -2,81     | 0              | 0             | <0.001         |
| miR-126*                          | -5.795      | -2,75     | 0              | 0             | <0.001         |
| miR-139*                          | -6.477      | -2,93     | 0              | 0             | <0.001         |

A) MicroRNAs upregulated and B) MicroRNAs downregulated.

FC, fold change

§ p-adj calculated with FDR method

\*miRNAs validated by RTqPCR.

**Table 3: Gene-Ontology terms dysregulated by differentially expressed miRNA.**

|            | N   | lor      | pval     | padj     | pat | GO                                                  |
|------------|-----|----------|----------|----------|-----|-----------------------------------------------------|
| GO:0007517 | 306 | 0,258453 | 9,59E-06 | 0,031571 | 1   | muscle organ development                            |
| GO:0060541 | 151 | 0,34596  | 2,75E-05 | 0,031571 | 1   | respiratory system development                      |
| GO:0070848 | 498 | 0,191793 | 3,24E-05 | 0,031571 | 1   | response to growth factor stimulus                  |
| GO:0071363 | 489 | 0,1885   | 5,12E-05 | 0,031571 | 1   | cellular response to growth factor stimulus         |
| GO:0030324 | 131 | 0,358327 | 5,18E-05 | 0,031571 | 1   | lung development                                    |
| GO:0008543 | 150 | 0,336667 | 5,42E-05 | 0,031571 | 1   | fibroblast growth factor receptor signaling pathway |
| GO:0061061 | 406 | 0,204676 | 5,69E-05 | 0,031571 | 1   | muscle structure development                        |
| GO:0030323 | 134 | 0,348344 | 6,87E-05 | 0,033321 | 1   | respiratory tube development                        |
| GO:0050767 | 336 | 0,215493 | 0,000109 | 0,040653 | 1   | regulation of neurogenesis                          |
| GO:0048015 | 148 | 0,320334 | 0,000126 | 0,040653 | 1   | phosphatidylinositol-mediated signaling             |
| GO:0048017 | 148 | 0,320334 | 0,000126 | 0,040653 | 1   | inositol lipid-mediated signaling                   |
| GO:0044087 | 296 | 0,226529 | 0,000128 | 0,040653 | 1   | regulation of cellular component biogenesis         |
| GO:1901698 | 468 | 0,180575 | 0,000137 | 0,040653 | 1   | response to nitrogen compound                       |
| GO:0010243 | 441 | 0,184938 | 0,000147 | 0,040653 | 1   | response to organonitrogen compound                 |
| GO:0035295 | 381 | 0,197236 | 0,000164 | 0,042486 | 1   | tube development                                    |
| GO:0030510 | 56  | 0,502461 | 0,000201 | 0,045892 | 1   | regulation of BMP signaling pathway                 |
| GO:0033238 | 42  | -0,55751 | 0,000193 | 0,045892 | -1  | regulation of cellular amine metabolic process      |

N, number of genes; lor, Log Odds Ratio; pval, p-value; padj, p-value adjusted by multiple test method; pat, pathway; GO, Gene ontology term (biological process).

analyze dysregulated miRNAs in fresh frozen tumor and adjacent normal samples of a large cohort of characterized NSCLC patients using SOLiD technology.

NGS technology allows the whole microRNAome of each sample to be analyzed with high sensitivity, a wide dynamic range, high accuracy, and extraordinary technical reproducibility [24, 25]. In the cancer research context, NGS technology is especially useful compared to other methodologies because it allows the detection of miRNAs not yet described [24, 26, 27]. However, there are some limitations in using NGS, including its high cost and the large amounts of data it produces. Nonetheless, the development of new platforms using barcodes, are now becoming available. This allow several samples to be multiplexed into a single run [28], and is contributing to a continuing cost reduction and new bioinformatics tools for analyzing and interpreting these complex data sets [27, 29].

Of the 39 dysregulated miRNAs in the training set, 22 miRNAs were validated using RTqPCR, which is considered one of the gold standard techniques for gene expression analyses due to its sensitivity and robustness requiring minimal amounts of RNA [30-32]. Functional analyses of these dysregulated miRNAs shown an enrichment of several biological processes related to lung specifically, such as, respiratory system development, lung development, respiratory tube development, which seem to indicate that these differentially expressed miRNAs could be tissue specific. Interestingly, other biological processes, related to cellular response to growth factor

stimulus were found enriched in this analysis as well. This fact is in concordance with an increased growth cell in carcinogenesis process.

Regarding the analyzed miRNAs, the overexpression of miR-182, miR-31, miR135b, miR-199b, miR-224 and miR-196b and miR-34a have been detected in both the training and validation set. Extensive profiling studies have connected dysregulated levels of miR-182 with several cancer types, including NSCLC [33]. Furthermore, miR-182 may function as an oncogenic miRNA to enhance cancer cell proliferation, survival, aggressiveness, tumorigenesis, and drug resistance [34-36]. Some targets of miR-182 are involved in repaired DNA [37] and others are tumor suppressor genes such as *PTEN* and *TP53* (miRTarBase data). A meta-analysis in various cancers has shown the overexpression of miR-31 [38], which was overexpressed in early stages, and expression was high in tumor progression and reached higher levels in advanced stages. MiR-31 has been shown to act as an oncogenic miRNA by targeting specific tumor suppressors, including the large tumor suppressor 2 (*LATS2*) and PP2A regulatory subunit B alpha isoform (*PPP2R2A*) [39]. An analysis of the predicted targets of miR-31 found a relationship between this miRNAs and the initiation, progression and treatment response of lung cancer through the cell cycle, the cytochrome P450 pathway, metabolic pathways, apoptosis, the chemokine signaling pathway, and the MAPK signaling pathway [40].

A few studies have described miR-135b and its relationship in NSCLC, but only Lin et al. have found

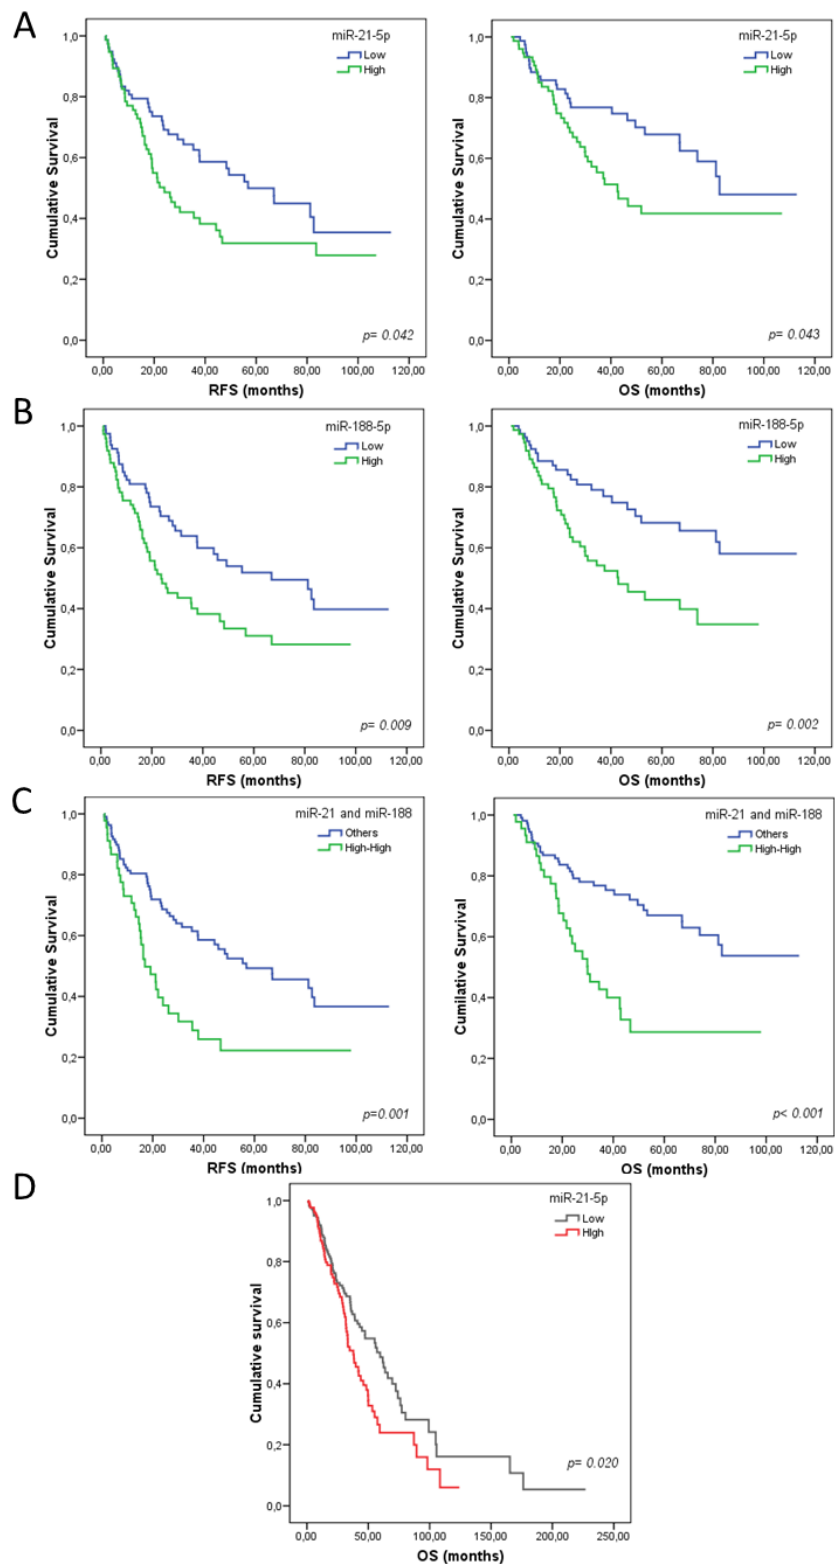

**Figure 2: Kaplan-Meier curves for overall survival (OS) and relapse-free survival (RFS) according to miRNA expression for patients with resected non-small cell lung cancer (NSCLC).** Panels A and B show OS and RFS for miR-21-5p and miR-188-5p, respectively in the validation set. Panel C shows the significant correlation between the combined variable, high expression of both miRNAs (miR-21high and miR-188high), with shorter OS and RFS times in validation set. Panel D shows OS and RFS for miR-21 in the *in silico* set. Continuous variables were dichotomized as high ( $\geq$  median) and low ( $<$  median), using the median relative expression of each gene as a cutoff. Statistics were calculated using the log-rank test, and the significance was set at  $p < 0.05$ .

**Table 4: Univariate (log-rank test) and multivariate (Cox regression model) analyses for RFS and OS**

| Variable                                                                                          | Univariate         |                       |                    |                         | Multivariate |                 |          |       |                 |          |
|---------------------------------------------------------------------------------------------------|--------------------|-----------------------|--------------------|-------------------------|--------------|-----------------|----------|-------|-----------------|----------|
|                                                                                                   | RFS                |                       | OS                 |                         | RFS          |                 |          | OS    |                 |          |
|                                                                                                   | Median (months)    | <i>p</i> <sup>§</sup> | Median (months)    | <i>p</i> <sup>§</sup>   | HR           | 95% CI          | <i>p</i> | HR    | 95% CI          | <i>p</i> |
| <b>miR-21-5p</b><br>(high vs. low)                                                                | 24.03 vs.<br>56.83 | 0.042                 | 42.60 vs.<br>82.60 | 0.043                   | --           | --              | --       | --    | --              | --       |
| <b>miR-188-5p</b><br>(high vs. low)                                                               | 23.67 vs.<br>66.97 | 0.009                 | 42.90 vs.<br>NR    | 0.002                   | --           | --              | --       | --    | --              | --       |
| <b>Combined miRNAs</b><br>(miR-21 <sup>high</sup> miR-188 <sup>high</sup> vs. other combinations) | 16.97 vs.<br>56.83 | 0.001<br>(0.006)*     | 29.90 vs.<br>NR    | < 0.0001<br>(< 0.0006)* | 2.170        | 1.372-<br>3.431 | 0.001    | 3.256 | 1.907-<br>5.561 | <0.0001  |
| <b>KRAS Status</b><br>(mutated vs. WT)                                                            | 16.97 vs.<br>46.67 | 0.034                 | 27.90 vs.<br>NR    | 0.038                   | 2.076        | 1.215-<br>3.831 | 0.020    |       |                 |          |
| <b>Lymph node involvement</b><br>(yes vs. no)                                                     | 26.23 vs.<br>48.33 | 0.029                 | --                 | --                      | --           | --              | --       | --    | --              | --       |

§ *p*-value was calculated using the log-rank test. \* *p*-values with Bonferroni corrections are shown in parentheses. CI, confidence interval; HR, hazard ratio; NR, not-reached; OS, overall survival; RFS, relapse-free survival.

upregulated miR-135b in invasive NSCLC cells [41]. Other studies in different cancer types have found an overexpression in miR-135b [42, 43]. MiR-135b expression enhances cancer cell invasive and migratory abilities *in vitro* and promotes cancer metastasis *in vivo* by targeting multiple key components on the Hippo pathway, including *LATS2*, *BTRCP* and *NDR2*, as well as *LZTS1* [41]. Regarding miR-224, some studies in the same type [44] and different types of cancer support our results [45, 46]. MiR-224 functions as an oncogene in NSCLC by directly targeting *TNFAIP1* and *SMAD4*. Caspase 3 (*CASP3*) and caspase 7 (*CASP7*) are targets of miR-224 in NSCLC, and miR-224 partly promotes lung cancer cells proliferation and migration by directly targeting *CASP7* and downregulating its expression; miR-224 attenuates *TNF-α* induced apoptosis by directly targeting *CASP3*, which results in a reduced cleaved parp1 expression in lung cancer cells and suggests a oncogenic role for miR-224 in lung cancer pathogenesis [47]. Two studies in lung cancer tissues and lung adenocarcinomas support our data about miR-196b [48, 49]. The same results have been found in different cancer types [50]. *HOXA9* has been suggested to act as a target of miR-196b by playing a central role in controlling the aggressive behavior of lung cancer cells [49]. Unexpectedly, miR-34a was found upregulated in the training and validation set. MiR-34a has been reported to be down-regulated in NSCLC [51] other cancer types and to work as tumor suppressor miRNA. Considering all these results, more studies need to be performed in more extended cohorts of patients to be able to better understand the function of miR-34a in NSCLC.

The down-regulation of miR-451a, miR-144, miR-195, miR-218, miR-145, miR-30a, miR-126 and miR-139 has been found in both the training and validation set. Two

meta-analyses in NSCLC have demonstrated the reduced expression of these eight miRNAs in tumor [52, 53]. *AKT* and oncogene *MYC* have been described as targets, and a role of miR-451a in the carcinogenesis process has been shown [54]. The met proto-oncogene (*MET*), which is often amplified in human cancers and functions as an important regulator of cell growth and tumor invasion, has been identified as a direct target of miR-144 [55]. MiR-195 overexpression inhibits ACHN cell viability, migration, and invasion, and also induces cell apoptosis by targeting *VEGFR2* via the PI3K/AKT and Raf/MEK/ERK signaling pathways, which indicates that miR-195 plays a tumor suppressive role [56]. Studies *in vitro* have shown an anti-cancer function of miR-218, and the down-expression of miR-218 increases myocyte enhancer factor 2D (*MEF2D*) levels by promoting lung cancer growth [57], and by inhibiting NSCLC proliferation and metastasis *via* by downregulating *CDCP1* [58]. The down-regulation of miR-218 increases epithelial-mesenchymal transition and tumor metastasis in lung cancer by targeting Slug/ZEB2 signaling [59]. *In vitro* analyses have shown a tumor suppressor role of miR-145, where miR-145 inhibits *TGF-β*-induced epithelial-mesenchymal transition and invasion through the repression of *SMAD3* and *TGFBR2* in NSCLC cells [60, 61]. Besides, miR-145 inhibits the migration and invasion of lung cancer cells *via* fascin homolog 1 (*FSCN1*) downregulation [62] and cell growth is inhibited by miR-145, while *MYC* has been shown to be a direct target for miR-145 [63]. MiR-30a overexpression in lung tumor culture cells inhibits migration and cell invasion, and partially attributes to lower EYA2 expression [64] and influences NSCLC progression through the PI3K/AKT signaling pathway by targeting *IGF1R* [65]. MiR-126 is known to play a critical role in the angiogenesis process



[17, 66]. Furthermore *in vitro* analyses have shown that miR-126 overexpression in the NSCLC line cell inhibits cell growth through different gene targets, including *CRK*, *EGFL7* and *PIK3R2* [67-69]. Dysregulated miR-139 expression has been reported in some human tumor types. Analyses *in vitro* and *in vivo* have demonstrated miR-139-5p suppressed tumor growth and directly targeted *MET*, which could be a possible mechanism by which miR-139-5p regulates growth and the metastatic potential [70].

Other miRNAs such as miR-29a, miR-199-5p, miR-339-5p, miR-590-5p and miR-19b-1 are overexpressed in both the training and validation set, but have barely been described in cancer in general and in NSCLC in particular. Only one study in lung adenocarcinoma has identified miR-29a overexpression in a paired-sample analysis (tumor and normal from the same patients) [71]. Regarding miR-199-5p, only one study in lung cancer and miRNA changes related to asbestos has reported the same results [72]. MiR-339-5p overexpression has been reported in a study performed in the peripheral blood of 100 individuals which included 86 patients with predominantly early-stage NSCLC and 24 healthy donors [73]. MiR-590-5p overexpression has not been reported in NSCLC, but studies support our findings in other cancer types [74, 75]. Although miR-19b-1 is not widely described in the literature, miR-19b overexpression was validated in our validation cohort. To support this finding, miR-19b-1 upregulation has been observed in HeLa human cancer cells and in mice lung tumors [76], but no similar study to ours is currently available which detects deregulation in this miRNA. For this reason, more studies are needed to better understand the relationship between these miRNAs and the carcinogenesis process of NSCLC.

In agreement with our findings, miR-21 has been reported to be overexpressed in several solid malignancies [77-79], including lung cancer [80, 81] where several studies in paired tumor and adjacent normal tissue samples in NSCLC showed similar results [18, 71, 82]. Interestingly, different meta-analysis studies performed in many tumor types [83, 84] and which only considered NSCLC [52, 53] confirm this finding. Therefore, *in silico* analyses have shown that miR-21 has large number of genes targets and many of them are directly involved in essential pathways dysregulated in the tumorigenesis process.

The analysis of the prognostic value of dysregulated miRNAs show that higher relative expression of miR-21 and miR-188 is associated with worse outcome in our cohort of resectable NSCLC. These data agreed with the *in silico* study performed on data obtained from the TCGA cohort, confirming the overexpression of both miRNAs in tumor samples compared to normal lung tissues. In the TCGA set, patients with higher expression of miR-21 exhibited shorter OS (37.86 vs 59.66 months,  $p = 0.020$ ). In line with these results, some studies have reported that high levels of miR-21 in either tumor or blood samples

were associated with a negative prognosis in lung cancer patients [15, 83, 85, 86]. Interestingly, Seike et al. described that aberrant miR-21 expression; enhanced by the activated EGFR signaling pathway, played a significant role in lung carcinogenesis in those that never-smoked [82]. Mechanistically, it has been described that overexpression of miR-21 leads to the inhibition of several tumor suppressor genes, such as *PTEN*, *TPMI* and *PDCD4* [87]. Thus, miR-21 seems to be a promising biomarker and is also an interesting therapeutic target whose inhibition may have benefits in NSCLC patients. Recently, a preclinical study in a murine lung cancer model with an anti-miR-21 molecule revealed that treated animals displayed tumor regression or no tumor growth and prolonged survival while compared with the untreated group [88].

Our results obtained in the validation set by RTqPCR also indicated that patients with elevated miR-188 expression in tumor tissue had a shorter RFS ( $p = 0.009$ ) and OS ( $p = 0.002$ ). However, these findings could not be confirmed by *in silico* analysis in the TCGA cohort due to probably technical (pair tumor/normal analysis, NGS vs RTqPCR) and biological (amount of miRNA) differences. Several interpretations can explain this results. Initially, miRNA data expression of patients in our validation cohort was analyzed using RTqPCR while the TCGA validation cohort samples were analyzed by NGS. The different sensitivity between these two techniques could explain, in part, these different results. Otherwise, a distinct concept to calculate relative expression could have influence over them too. In validation set, the relative miRNA expression was calculated as the number of times the tumor tissue expression was higher or lower compared to its paired-normal tissue for each patient (fold-change) whereas the relative expression of TCGA data was calculated by RPKM. Despite the miRNA profiling techniques have vastly improved in the last years, there are still differences in performance and platform-specific biases that can impact the generated output [28]. Finally, the expression levels of miR-21 were high in normal and tumor samples, due to its constitutive expression, which is frequently upregulated in solid tumours. Therefore, the range RPKM values between high and low normalized was wide, so when dichotomization is performed, patients with higher or lower values from median are clearly defined and Kaplan-Meier analysis shown two well differentiated and significative populations of patients with a clearly different prognosis. In contrast, the expression levels of miR-188 were very low in normal and even in tumor samples. Consequently, the ranges between normalized values were narrow, so when dichotomization is performed, patients with higher or lower values from median were not clearly differentiated and Kaplan-Meier differences found were not significative. This can explain why miR-188 cannot find a prognosis value in TCGA cohort.

There are limited studies analyzing the prognostic

role of miR-188 in cancer [89-91], and in fact none has been found in lung cancer to date. In concordance with our results, in patients with acute myeloid leukemia (cytogenetically-normal), high miR-188 expression has been significantly associated with shorter OS and event-free survival [89]. Although the computational analysis has shown a relationship of miR-188 with the carcinogenesis process, further studies are still needed to clarify the function of this miRNA in carcinogenesis and its prognostic implication in cancer.

Finally, we identified a patient subgroup defined by a combined higher expression levels of miR-21 and miR-188 that exhibited poor outcome and resulted in an independent prognostic factor for RFS (HR: 0.485 [0.313-0.753];  $p = 0.001$ ) and OS (HR 0.389 [0.237-0.638];  $p < 0.0001$ ) in multivariate analysis, suggesting its potential role as biomarker useful for distinguishing patients which could benefit from more exhaustive monitoring.

In summary, the miRNA signature identified in this work may provide new biomarkers for providing early prognoses in NSCLC patients as well as being potentially useful as a therapeutic target for this disease in the near future.

## CONCLUSIONS

This study revealed that the NGS system can accurately detect miRNAs and specifically identify dysregulated miRNAs in resectable NSCLC samples; furthermore, these results were validated in a large independent cohort of patients. Survival analyses showed that miR-21-5p or miR-188-5p overexpression were negative prognostic factors, implicating miR-188 in NSCLC for the first time. Furthermore, the combined signature of these two miRNAs was significantly associated with shorter RFS and OS times and was confirmed by a multivariate analysis as an independent prognostic marker, representing a potential novel negative prognostic biomarker for NSCLC. However, especially considering that the role of miR-188 in NSCLC remains unclear, further studies must be performed in diverse populations and using functional evaluation methods in order to confirm and extend our findings. Given that, to date, very few studies have used paired fresh frozen-tissues, and it would be interesting to extend this study in NSCLC, using a greater number of samples, as well as in other tumor types. We consider our findings to be important in both translational clinical research and in the development of novel miRNA-based cancer therapies.

## MATERIALS AND METHODS

### Patients and tissue samples

This retrospective study included 32 patients in the training set, and 178 patients in the validation set with NSCLC from the *Consortio Hospital General Universitario de Valencia* who underwent surgery between 2004 and 2013, and who fit the eligibility criteria: resected, non-pretreated stage I to IIIA patients (according to the American Joint Committee on Cancer staging manual) with a histological diagnosis of NSCLC. Tumor and adjacent normal lung specimens were obtained by surgical resection and were preserved in RNA-later at  $-80^{\circ}\text{C}$  until analysis (Applied Biosystems, USA). The study was conducted in accordance with the Declaration of Helsinki, and the institutional ethical review board approved the protocol. Relapse-free survival (RFS) was estimated as the time from surgery to recurrence or death from the disease, whereas overall survival (OS) was defined as the time from diagnosis to the date of death or the patient's last follow-up. *In silico* validation set included data from 618 resectable NSCLC caucasian patients from the TCGA project.

### RNA isolation and quality evaluation

Total RNA isolation from the tumor and normal fresh frozen tissues was performed using TRI Reagent (Sigma, USA) according to the manufacturer's instructions. RNA samples were subjected to quality control before carrying out NGS; using RNA Nano and Small RNA Chips on an Agilent 2100 Bioanalyzer (Agilent technologies, Germany). The miRNA fraction was enriched with an optimal profile using a PureLink miRNA isolation kit (Invitrogen, USA). After performing quality control, 32 of the tested samples had an optimal quality profile for NGS sequencing.

### NGS

Small RNA sequencing using a sample barcode-identification multiplex with SOLiD (Sequencing by Oligo Ligation Detection) technology was performed. A SOLiD total RNA-seq kit was used to prepare small RNA libraries and templated beads were subsequently prepared according to the manufacturer's instructions. Briefly, the libraries were constructed and the cDNAs amplified with the 3' PCR primers supplied in the SOLiD RNA barcoding kit containing the P2 sequence required for emulsion PCR (ePCR) using beads. After ePCR and bead enrichment, the samples were deposited onto a slide and sequenced on the SOLiD™ 4 System (Applied Biosystems, USA).

## RTqPCR

The expression of 22 randomly-selected miRNAs was validated in an independent cohort using miRNA-specific TaqMan assays (Applied Biosystems). Briefly, reverse transcription (RT) was performed with 500 ng of total RNA using a TaqMan MicroRNA reverse transcription kit (Applied Biosystems) following the multiplex RT protocol, according to the manufacturer's instructions. Normalization and relative expression quantification was calculated with miR-16 using the comparative Cq method ( $2^{-(Cq_{\text{sample}} - Cq_{\text{control}})}$ ) to validate the miRNA expression and used the Pfaffl formula to perform survival analysis.

## Bioinformatic analysis

In the training set, color space fasta (csfasta) and quality (qual) format input data were grouped for each sample and transformed into FASTQ files in order to import them into the CLC Genomics Workbench software (version 5.5.2; CLC bio, Denmark). The trimming and count were performed together to remove adapter sequences and to count different tags. The miRNAs were subsequently annotated using the miRBase platform (release 20.0, *Homo sapiens*) and the Ensembl.org or tRNAscan-SE databases for other small RNA biotypes. Reads for the same mature miRNAs were grouped and normalized by totals, reads per kilobase per million mapped reads (RPKM). Principal components analysis was performed to visualize the sample grouping and the Baggerley test was used to analyze differential miRNA expression between tumor and normal tissues and the FDR (false discovery rate) was used to adjust *p*-values.

Functional analyses were carried out using a new bioinformatics algorithm [92] with differentially dysregulated miRNAs, applying statistics and *p*-values obtained from Baggerley test.

*In silico* validation was performed using two lung cancer data sets from the TCGA consortium [93, 94]. Clinical and miRNA-seq (Illumina HiSeq platform) information was directly downloaded from the ICGC Data Portal [95], <https://dcc.icgc.org/releases/current/projects/LUAD-US>, and <https://dcc.icgc.org/releases/current/projects/LUSC-US>. MiR-21-5p and miR-188-5p RPKM values were extracted using their genomic positions, obtained from miRBase. *T*-tests paired (*p*<sub>1</sub>, only cases with paired tumor and normal samples, *N* = 71) and non-paired (*p*<sub>2</sub>, comparison of all tumor samples vs all normal samples) were carried out on log-transformed expression values to analyse differential expression, using R statistical environment [96]. Analyses were considered to be statistically significant to *p*-value ≤ 0.05.

## Statistical analysis

Mann-Whitney and Chi-square tests were applied to confirm that there were not statistically significant differences in clinicopathological characteristics between both, training and validation sets. The Wilcoxon matched-pairs test was used to validate NGS results tested by RTqPCR. The survival curves were plotted according to the univariate Kaplan-Meier method (log-rank) with clinicopathological variables and dichotomized microRNA expression levels. For multiple comparisons, the Bonferroni method was applied, maintaining the overall probability of *kp* < 0.05. Finally, a Cox model for multivariate analyses was used to assess the independent value of the tested biomarkers. Statistical analysis was performed using the Statistical Package for the Social Sciences (SPSS, USA) version 15.0. A *p*-value ≤ 0.05 was considered to be statistically significant for all analyses.

## CONFLICTS OF INTEREST

The authors declare no conflict of interest.

## GRANT SUPPORT

This work was supported by the RD12/0036/0025 and RD06/0020/1024 PI12-02838, ISCIII, grants from the Fondo Europeo de Desarrollo Regional (FEDER), by funds from the Proyecto de Investigación Fundamental Orientada a la Transmisión de Conocimiento a la Empresa (TRACE; TRA09-0132) and Beca Roche Oncohematología.

## Editorial note

This paper has been accepted based in part on peer-review conducted by another journal and the authors' response and revisions as well as expedited peer-review in Oncotarget.

## REFERENCES

1. Torre LA, Bray F, Siegel RL, Ferlay J, Lortet-Tieulent J, Jemal A. Global cancer statistics, 2012. *CA Cancer J Clin.* 2015; 65:87-108.
2. Ramalingam SS, Owonikoko TK, Khuri FR. Lung cancer: New biological insights and recent therapeutic advances. *CA Cancer J Clin.* 2011; 61:91-112.
3. Camps C, del Pozo N, Blasco A, Blasco P, Sirera R. Importance of quality of life in patients with non-small-cell lung cancer. *Clin Lung Cancer.* 2009; 10:83-90.
4. Hoffman PC, Mauer AM, Vokes EE. Lung cancer. *Lancet.* 2000; 355:479-485.
5. Carnio S, Novello S, Papotti M, Loiacono M, Scagliotti GV.

- Prognostic and predictive biomarkers in early stage non-small cell lung cancer: tumor based approaches including gene signatures. *Transl Lung Cancer Res.* 2013; 2:372-381.
6. Burotto M, Thomas A, Subramaniam D, Giaccone G, Rajan A. Biomarkers in early-stage non-small-cell lung cancer: current concepts and future directions. *J Thorac Oncol.* 2014; 9:1609-1617.
  7. Camps C, Jantus-Lewintre E, Cabrera A, Blasco A, Sanmartin E, Gallach S, Caballero C, del Pozo N, Rosell R, Guijarro R, Sirera R. The identification of KRAS mutations at codon 12 in plasma DNA is not a prognostic factor in advanced non-small cell lung cancer patients. *Lung Cancer.* 2011; 72:365-369.
  8. Usó M, Jantus-Lewintre E, Bremnes RM, Calabuig S, Blasco A, Pastor E, Borreda I, Molina-Pinelo S, Paz-Ares L, Guijarro R, Martorell M, Forteza J, Camps C, Sirera R. Analysis of the immune microenvironment in resected non-small cell lung cancer: the prognostic value of different T lymphocyte markers. *Oncotarget.* 2016; 7:52849–52861. doi: 10.18632/oncotarget.10811.
  9. Lagos-Quintana M, Rauhut R, Lendeckel W, Tuschl T. Identification of novel genes coding for small expressed RNAs. *Science.* 2001; 294:853-858.
  10. Lau NC, Lim LP, Weinstein EG, Bartel DP. An abundant class of tiny RNAs with probable regulatory roles in *Caenorhabditis elegans*. *Science.* 2001; 294:858-862.
  11. Lee RC, Ambros V. An extensive class of small RNAs in *Caenorhabditis elegans*. *Science.* 2001; 294:862-864.
  12. Lee RC, Feinbaum RL, Ambros V. The *C. elegans* heterochronic gene *lin-4* encodes small RNAs with antisense complementarity to *lin-14*. *Cell.* 1993; 75:843-854.
  13. Ambros V. MicroRNA pathways in flies and worms: growth, death, fat, stress, and timing. *Cell.* 2003; 113:673-676.
  14. Duncavage E, Goodgame B, Sezhiyan A, Govindan R, Pfeifer J. Use of microRNA expression levels to predict outcomes in resected stage I non-small cell lung cancer. *J Thorac Oncol.* 2010; 5:1755-1763.
  15. Markou A, Sourvinou I, Vorkas PA, Yousef GM, Lianidou E. Clinical evaluation of microRNA expression profiling in non small cell lung cancer. *Lung Cancer.* 2013; 81:388-396.
  16. Wang Y, Chen J, Lin Z, Cao J, Huang H, Jiang Y, He H, Yang L, Ren N, Liu G. Role of deregulated microRNAs in non-small cell lung cancer progression using fresh-frozen and formalin-fixed, paraffin-embedded samples. *Oncol Lett.* 2016; 11:801-808.
  17. Gallach S, Calabuig-Farinas S, Jantus-Lewintre E, Camps C. MicroRNAs: promising new antiangiogenic targets in cancer. *Biomed Res Int.* 2014; 2014:878450.
  18. Bediaga NG, Davies MP, Acha-Sagredo A, Hyde R, Raji OY, Page R, Walshaw M, Gosney J, Alfirevic A, Field JK, Liloglou T. A microRNA-based prediction algorithm for diagnosis of non-small lung cell carcinoma in minimal biopsy material. *Br J Cancer.* 2013; 109:2404-2411.
  19. Skrzypski M, Czapiewski P, Goryca K, Jassem E, Wyrwicz L, Pawlowski R, Rzyman W, Biernat W, Jassem J. Prognostic value of miRNA expression in operable non-small cell lung cancer patients. *Br J Cancer.* 2014.
  20. Gasparini P, Cascione L, Landi L, Carasi S, Lovat F, Tibaldi C, Ali G, D’Incecco A, Minuti G, Chella A, Fontanini G, Fassan M, Cappuzzo F, Croce CM. microRNA classifiers are powerful diagnostic/prognostic tools in ALK-, EGFR-, and KRAS-driven lung cancers. *Proc Natl Acad Sci U S A.* 2015; 112:14924-14929.
  21. Rolfo C, Fanale D, Hong DS, Tsimberidou AM, Piha-Paul SA, Pauwels P, Van Meerbeeck JP, Caruso S, Bazan V, Cicero G, Russo A, Giovannetti E. Impact of microRNAs in resistance to chemotherapy and novel targeted agents in non-small cell lung cancer. *Curr Pharm Biotechnol.* 2014; 15:475-485.
  22. Volinia S, Calin GA, Liu CG, Ambs S, Cimmino A, Petrocca F, Visone R, Iorio M, Roldo C, Ferracin M, Prueitt RL, Yanaihara N, Lanza G, et al. A microRNA expression signature of human solid tumors defines cancer gene targets. *Proc Natl Acad Sci U S A.* 2006; 103:2257-2261.
  23. Yanaihara N, Caplen N, Bowman E, Seike M, Kumamoto K, Yi M, Stephens RM, Okamoto A, Yokota J, Tanaka T, Calin GA, Liu CG, Croce CM, Harris CC. Unique microRNA molecular profiles in lung cancer diagnosis and prognosis. *Cancer Cell.* 2006; 9:189-198.
  24. Tam S, de BR, Tsao MS, McPherson JD. Robust global microRNA expression profiling using next-generation sequencing technologies. *Lab Invest.* 2014; 94:350-358.
  25. Uso M, Jantus-Lewintre E, Sirera R, Bremnes RM, Camps C. miRNA detection methods and clinical implications in lung cancer. *Future Oncol.* 2014; 10:2279-2292.
  26. Liu L, Li Y, Li S, Hu N, He Y, Pong R, Lin D, Lu L, Law M. Comparison of next-generation sequencing systems. *J Biomed Biotechnol.* 2012; 2012:251364.
  27. Chugh P, Dittmer DP. Potential pitfalls in microRNA profiling. *Wiley Interdiscip Rev RNA.* 2012; 3:601-616.
  28. Pritchard CC, Cheng HH, Tewari M. MicroRNA profiling: approaches and considerations. *Nat Rev Genet.* 2012; 13:358-369.
  29. Linsen SE, de WE, Janssens G, Heater S, Chapman L, Parkin RK, Fritz B, Wyman SK, de BE, Voest EE, Kuersten S, Tewari M, Cuppen E. Limitations and possibilities of small RNA digital gene expression profiling. *Nat Methods.* 2009; 6:474-476.
  30. Buitrago DH, Patnaik SK, Kadota K, Kannisto E, Jones DR, Adusumilli PS. Small RNA sequencing for profiling microRNAs in long-term preserved formalin-fixed and paraffin-embedded non-small cell lung cancer tumor specimens. *PLoS One.* 2015; 10:e0121521.
  31. Wang J, Li Z, Ge Q, Wu W, Zhu Q, Luo J, Chen L. Characterization of microRNA transcriptome in tumor, adjacent, and normal tissues of lung squamous cell

- carcinoma. *J Thorac Cardiovasc Surg*. 2015; 149:1404-1414.
32. Yang C, Sun C, Liang X, Xie S, Huang J, Li D. Integrative analysis of microRNA and mRNA expression profiles in non-small-cell lung cancer. *Cancer Gene Ther*. 2016; 23:90-97.
  33. Stenvold H, Donnem T, Andersen S, Al-Saad S, Busund LT, Bremnes RM. Stage and tissue-specific prognostic impact of miR-182 in NSCLC. *BMC Cancer*. 2014; 14:138.
  34. Pignot G, Cizeron-Clairac G, Vacher S, Susini A, Tozlu S, Vieillefond A, Zerbib M, Lidereau R, Debre B, Amsellem-Ouazana D, Bieche I. microRNA expression profile in a large series of bladder tumors: identification of a 3-miRNA signature associated with aggressiveness of muscle-invasive bladder cancer. *Int J Cancer*. 2013; 132:2479-2491.
  35. Cekaite L, Rantala JK, Bruun J, Guriby M, Agesen TH, Danielsen SA, Lind GE, Nesbakken A, Kallioniemi O, Lothe RA, Skotheim RI. MiR-9, -31, and -182 deregulation promote proliferation and tumor cell survival in colon cancer. *Neoplasia*. 2012; 14:868-879.
  36. Liu H, Wang Y, Li X, Zhang YJ, Li J, Zheng YQ, Liu M, Song X, Li XR. Expression and regulatory function of miRNA-182 in triple-negative breast cancer cells through its targeting of profilin 1. *Tumour Biol*. 2013; 34:1713-1722.
  37. Krishnan K, Steptoe AL, Martin HC, Wani S, Nones K, Waddell N, Mariasegaram M, Simpson PT, Lakhani SR, Gabrielli B, Vlassov A, Cloonan N, Grimmond SM. MicroRNA-182-5p targets a network of genes involved in DNA repair. *RNA*. 2013; 19:230-242.
  38. Wang S, Hu J, Zhang D, Li J, Fei Q, Sun Y. Prognostic role of microRNA-31 in various cancers: a meta-analysis. *Tumour Biol*. 2014; 35:11639-11645.
  39. Meng W, Ye Z, Cui R, Perry J, Dedousi-Huebner V, Huebner A, Wang Y, Li B, Volinia S, Nakanishi H, Kim T, Suh SS, Ayers LW, et al. MicroRNA-31 Predicts the Presence of Lymph Node Metastases and Survival in Patients with Lung Adenocarcinoma. *Clin Cancer Res*. 2013; 19:5423-5433.
  40. Gao W, Liu L, Xu J, Shao Q, Liu Y, Zeng H, Shu Y. A systematic analysis of predicted MiR-31-targets identifies a diagnostic and prognostic signature for lung cancer. *Biomed Pharmacother*. 2014; 68:419-427.
  41. Lin CW, Chang YL, Chang YC, Lin JC, Chen CC, Pan SH, Wu CT, Chen HY, Yang SC, Hong TM, Yang PC. MicroRNA-135b promotes lung cancer metastasis by regulating multiple targets in the Hippo pathway and LZTS1. *Nat Commun*. 2013; 4:1877.
  42. Darnet S, Moreira FC, Hamoy IG, Burbano R, Khayat A, Cruz A, Magalhaes L, Silva A, Santos S, Demachki S, Assumpcao M, Assumpcao P, Ribeiro-Dos-Santos A. High-Throughput Sequencing of miRNAs Reveals a Tissue Signature in Gastric Cancer and Suggests Novel Potential Biomarkers. *Bioinform Biol Insights*. 2015; 9:1-8.
  43. Gaedcke J, Grade M, Camps J, Sokilde R, Kaczkowski B, Schetter AJ, Difilippantonio MJ, Harris CC, Ghadimi BM, Moller S, Beissbarth T, Ried T, Litman T. The rectal cancer microRNAome—microRNA expression in rectal cancer and matched normal mucosa. *Clin Cancer Res*. 2012; 18:4919-4930.
  44. Cui R, Meng W, Sun HL, Kim T, Ye Z, Fassan M, Jeon YJ, Li B, Vicentini C, Peng Y, Lee TJ, Luo Z, Liu L, et al. MicroRNA-224 promotes tumor progression in nonsmall cell lung cancer. *Proc Natl Acad Sci U S A*. 2015; 112:E4288-E4297.
  45. Adamopoulos PG, Kontos CK, Rapti SM, Papadopoulos IN, Scorilas A. miR-224 overexpression is a strong and independent prognosticator of short-term relapse and poor overall survival in colorectal adenocarcinoma. *Int J Oncol*. 2015; 46:849-859.
  46. Avgeris M, Mavridis K, Tokas T, Stravodimos K, Fragoulis EG, Scorilas A. Uncovering the clinical utility of miR-143, miR-145 and miR-224 for predicting the survival of bladder cancer patients following treatment. *Carcinogenesis*. 2015; 36:528-537.
  47. Cui R, Kim T, Fassan M, Meng W, Sun HL, Jeon YJ, Vicentini C, Tili E, Peng Y, Scarpa A, Liang G, Zhang YK, Chakravarti A, Croce CM. MicroRNA-224 is implicated in lung cancer pathogenesis through targeting caspase-3 and caspase-7. *Oncotarget*. 2015; 6:21802-21815. doi: 10.18632/oncotarget.5224.
  48. Li X, Shi Y, Yin Z, Xue X, Zhou B. An eight-miRNA signature as a potential biomarker for predicting survival in lung adenocarcinoma. *J Transl Med*. 2014; 12:159.
  49. Yu SL, Lee DC, Sohn HA, Lee SY, Jeon HS, Lee JH, Park CG, Lee HY, Yeom YI, Son JW, Yoon YS, Kang J. Homeobox A9 directly targeted by miR-196b regulates aggressiveness through nuclear Factor-kappa B activity in non-small cell lung cancer cells. *Mol Carcinog*. 2015.
  50. Schultz NA, Werner J, Willenbrock H, Roslind A, Giese N, Horn T, Wojdemann M, Johansen JS. MicroRNA expression profiles associated with pancreatic adenocarcinoma and ampullary adenocarcinoma. *Mod Pathol*. 2012; 25:1609-1622.
  51. Gallardo E, Navarro A, Vinolas N, Marrades RM, Diaz T, Gel B, Quera A, Bandres E, Garcia-Foncillas J, Ramirez J, Monzo M. miR-34a as a prognostic marker of relapse in surgically resected non-small-cell lung cancer. *Carcinogenesis*. 2009; 30:1903-1909.
  52. Guan P, Yin Z, Li X, Wu W, Zhou B. Meta-analysis of human lung cancer microRNA expression profiling studies comparing cancer tissues with normal tissues. *J Exp Clin Cancer Res*. 2012; 31:54.
  53. Vosa U, Voorder T, Kolde R, Vilo J, Metspalu A, Annilo T. Meta-analysis of microRNA expression in lung cancer. *Int J Cancer*. 2013; 132:2884-2893.
  54. Minna E, Romeo P, Dugo M, De Cecco L, Todoerti K, Pilotti S, Perrone F, Seregini E, Agnelli L, Neri A, Greco A,

- Borrello MG. miR-451a is underexpressed and targets AKT/mTOR pathway in papillary thyroid carcinoma. *Oncotarget*. 2016; 7:12731–12747. doi: 10.18632/oncotarget.7262.
55. Liu J, Xue H, Zhang J, Suo T, Xiang Y, Zhang W, Ma J, Cai D, Gu X. MicroRNA-144 inhibits the metastasis of gastric cancer by targeting MET expression. *J Exp Clin Cancer Res*. 2015; 34:35.
  56. Sun P, Wang L, Lu Y, Liu Y, Li L, Yin L, Zhang C, Zhao W, Shen B, Xu W. MicroRNA-195 targets VEGFR2 and has a tumor suppressive role in ACHN cells via PI3K/Akt and Raf/MEK/ERK signaling pathways. *Int J Oncol*. 2016; 49:1155-1163.
  57. Song L, Li D, Zhao Y, Gu Y, Zhao D, Li X, Bai X, Sun Y, Zhang X, Sun H, Wang Y, Peng L. miR-218 suppressed the growth of lung carcinoma by reducing MEF2D expression. *Tumour Biol*. 2016; 37:2891-2900.
  58. Zeng XJ, Wu YH, Luo M, Cong PG, Yu H. Inhibition of pulmonary carcinoma proliferation or metastasis of miR-218 via down-regulating CDCP1 expression. *Eur Rev Med Pharmacol Sci*. 2017; 21:1502-1508.
  59. Shi ZM, Wang L, Shen H, Jiang CF, Ge X, Li DM, Wen YY, Sun HR, Pan MH, Li W, Shu YQ, Liu LZ, Peiper SC, et al. Downregulation of miR-218 contributes to epithelial-mesenchymal transition and tumor metastasis in lung cancer by targeting Slug/ZEB2 signaling. *Oncogene*. 2017; 36:2577-2588.
  60. Hu H, Xu Z, Li C, Xu C, Lei Z, Zhang HT, Zhao J. MiR-145 and miR-203 represses TGF-beta-induced epithelial-mesenchymal transition and invasion by inhibiting SMAD3 in non-small cell lung cancer cells. *Lung Cancer*. 2016; 97:87-94.
  61. Xiang Y, Zhang Y, Tang Y, Li Q. MALAT1 Modulates TGF-beta1-Induced Endothelial-to-Mesenchymal Transition through Downregulation of miR-145. *Cell Physiol Biochem*. 2017; 42:357-372.
  62. Zhang Y, Lin Q. MicroRNA-145 inhibits migration and invasion by down-regulating FSCN1 in lung cancer. *Int J Clin Exp Med*. 2015; 8:8794-8802.
  63. Chen Z, Zeng H, Guo Y, Liu P, Pan H, Deng A, Hu J. miRNA-145 inhibits non-small cell lung cancer cell proliferation by targeting c-Myc. *J Exp Clin Cancer Res*. 2010; 29:151.
  64. Yuan Y, Zheng S, Li Q, Xiang X, Gao T, Ran P, Sun L, Huang Q, Xie F, Du J, Xiao C. Overexpression of miR-30a in lung adenocarcinoma A549 cell line inhibits migration and invasion via targeting EYA2. *Acta Biochim Biophys Sin (Shanghai)*. 2016; 48:220-228.
  65. Wen XP, Ma HL, Zhao LY, Zhang W, Dang CX. MiR-30a suppresses non-small cell lung cancer progression through AKT signaling pathway by targeting IGF1R. *Cell Mol Biol (Noisy -le-grand)*. 2015; 61:78-85.
  66. Anand S, Cheresch DA. Emerging Role of Micro-RNAs in the Regulation of Angiogenesis. *Genes Cancer*. 2011; 2:1134-1138. doi: 10.1177/1947601911423032.
  67. Crawford M, Brawner E, Batte K, Yu L, Hunter MG, Otterson GA, Nuovo G, Marsh CB, Nana-Sinkam SP. MicroRNA-126 inhibits invasion in non-small cell lung carcinoma cell lines. *Biochem Biophys Res Commun*. 2008; 373:607-612.
  68. Sun Y, Bai Y, Zhang F, Wang Y, Guo Y, Guo L. miR-126 inhibits non-small cell lung cancer cells proliferation by targeting EGFL7. *Biochem Biophys Res Commun*. 2010; 391:1483-1489.
  69. Song L, Li D, Gu Y, Wen ZM, Jie J, Zhao D, Peng LP. MicroRNA-126 Targeting PIK3R2 Inhibits NSCLC A549 Cell Proliferation, Migration, and Invasion by Regulation of PTEN/PI3K/AKT Pathway. *Clin Lung Cancer*. 2016; 17:e65-e75.
  70. Sun C, Sang M, Li S, Sun X, Yang C, Xi Y, Wang L, Zhang F, Bi Y, Fu Y, Li D. Hsa-miR-139-5p inhibits proliferation and causes apoptosis associated with down-regulation of c-Met. *Oncotarget*. 2015; 6:39756-39792. doi: 10.18632/oncotarget.5476.
  71. Cinegaglia NC, Andrade SC, Tokar T, Pinheiro M, Severino FE, Oliveira RA, Hasimoto EN, Cataneo DC, Cataneo AJ, Defaveri J, Souza CP, Marques MM, Carvalho RF, et al. Integrative transcriptome analysis identifies deregulated microRNA-transcription factor networks in lung adenocarcinoma. *Oncotarget*. 2016; 7:28920–34. doi: 10.18632/oncotarget.8713.
  72. Nymark P, Guled M, Borze I, Faisal A, Lahti L, Salmenkivi K, Kettunen E, Anttila S, Knuutila S. Integrative analysis of microRNA, mRNA and aCGH data reveals asbestos- and histology-related changes in lung cancer. *Genes Chromosomes Cancer*. 2011; 50:585-597.
  73. Ulivi P, Foschi G, Mengozzi M, Scarpi E, Silvestrini R, Amadori D, Zoli W. Peripheral blood miR-328 expression as a potential biomarker for the early diagnosis of NSCLC. *Int J Mol Sci*. 2013; 14:10332-10342.
  74. Chu Y, Ouyang Y, Wang F, Zheng A, Bai L, Han L, Chen Y, Wang H. MicroRNA-590 promotes cervical cancer cell growth and invasion by targeting CHL1. *J Cell Biochem*. 2014; 115:847-853.
  75. Xiao X, Tang C, Xiao S, Fu C, Yu P. Enhancement of proliferation and invasion by MicroRNA-590-5p via targeting PBRM1 in clear cell renal carcinoma cells. *Oncol Res*. 2013; 20:537-544.
  76. Fan Y, Yin S, Hao Y, Yang J, Zhang H, Sun C, Ma M, Chang Q, Xi JJ. miR-19b promotes tumor growth and metastasis via targeting TP53. *RNA*. 2014; 20:765-772.
  77. Jepsen RK, Novotny GW, Klarskov LL, Christensen IJ, Hogdall E, Riis LB. Investigating intra-tumor heterogeneity and expression gradients of miR-21, miR-92a and miR-200c and their potential of predicting lymph node metastases in early colorectal cancer. *Exp Mol Pathol*. 2016; 101:187-196.
  78. Latchana N, Ganju A, Howard JH, Carson WE, III. MicroRNA dysregulation in melanoma. *Surg Oncol*. 2016;

25:184-189.

79. Usmani A, Shoro AA, Memon Z, Hussain M, Rehman R. Diagnostic, prognostic and predictive value of MicroRNA-21 in breast cancer patients, their daughters and healthy individuals. *Am J Cancer Res.* 2015; 5:2484-2490.
80. Yang M, Shen H, Qiu C, Ni Y, Wang L, Dong W, Liao Y, Du J. High expression of miR-21 and miR-155 predicts recurrence and unfavourable survival in non-small cell lung cancer. *Eur J Cancer.* 2013; 49:604-615.
81. Capodanno A, Boldrini L, Proietti A, Ali G, Pelliccioni S, Niccoli C, D'Incecco A, Cappuzzo F, Chella A, Lucchi M, Mussi A, Fontanini G. Let-7g and miR-21 expression in non-small cell lung cancer: correlation with clinicopathological and molecular features. *Int J Oncol.* 2013; 43:765-774.
82. Seike M, Goto A, Okano T, Bowman ED, Schetter AJ, Horikawa I, Mathe EA, Jen J, Yang P, Sugimura H, Gemma A, Kudoh S, Croce CM, Harris CC. MiR-21 is an EGFR-regulated anti-apoptotic factor in lung cancer in never-smokers. *Proc Natl Acad Sci U S A.* 2009; 106:12085-12090.
83. Zhu W, Xu B. MicroRNA-21 identified as predictor of cancer outcome: a meta-analysis. *PLoS One.* 2014; 9:e103373.
84. Fu X, Han Y, Wu Y, Zhu X, Lu X, Mao F, Wang X, He X, Zhao Y, Zhao Y. Prognostic role of microRNA-21 in various carcinomas: a systematic review and meta-analysis. *Eur J Clin Invest.* 2011; 41:1245-1253.
85. Markou A, Tsaroucha EG, Kaklamanis L, Fotinou M, Georgoulas V, Lianidou ES. Prognostic value of mature microRNA-21 and microRNA-205 overexpression in non-small cell lung cancer by quantitative real-time RT-PCR. *Clin Chem.* 2008; 54:1696-1704.
86. Gao W, Yu Y, Cao H, Shen H, Li X, Pan S, Shu Y. Deregulated expression of miR-21, miR-143 and miR-181a in non small cell lung cancer is related to clinicopathologic characteristics or patient prognosis. *Biomed Pharmacother.* 2010; 64:399-408.
87. Li Z, Rana TM. Therapeutic targeting of microRNAs: current status and future challenges. *Nat Rev Drug Discov.* 2014; 13:622-638.
88. Florczuk M, Szpechcinski A, Chorostowska-Wynimko J. miRNAs as Biomarkers and Therapeutic Targets in Non-Small Cell Lung Cancer: Current Perspectives. *Target Oncol.* 2017.
89. Jinlong S, Lin F, Yonghui L, Li Y, Weidong W. Identification of let-7a-2-3p or/and miR-188-5p as prognostic biomarkers in cytogenetically normal acute myeloid leukemia. *PLoS One.* 2015; 10:e0118099.
90. Wang L, Liu H. microRNA-188 is downregulated in oral squamous cell carcinoma and inhibits proliferation and invasion by targeting SIX1. *Tumour Biol.* 2015.
91. Hamam R, Ali AM, Alsaleh KA, Kassem M, Alfayez M, Aldahmash A, Alajez NM. microRNA expression profiling on individual breast cancer patients identifies novel panel of circulating microRNA for early detection. *Sci Rep.* 2016; 6:25997.
92. Garcia-Garcia F, Panadero J, Dopazo J, Montaner D. Integrated gene set analysis for microRNA studies. *Bioinformatics.* 2016; 32:2809-2816.
93. Cancer Genome Atlas Research Network. Comprehensive genomic characterization of squamous cell lung cancers. *Nature.* 2012; 489:519-525.
94. Cancer Genome Atlas Research Network. Comprehensive molecular profiling of lung adenocarcinoma. *Nature.* 2014; 511:543-550.
95. Zhang J, Baran J, Cros A, Guberman JM, Haider S, Hsu J, Liang Y, Rivkin E, Wang J, Whitty B, Wong-Erasmus M, Yao L, Kasprzyk A. International Cancer Genome Consortium Data Portal—a one-stop shop for cancer genomics data. *Database (Oxford).* 2011; 2011:bar026.
96. R Core Team. R: A language and environment for statistical computing [Computer Software]. Vienna: R Foundation for Statistical Computing Vienna, Austria. 2015. Retrieved from <http://www.r-project.org/>.
