# Supplementary material for: MicroRNA profiling associated with non-small cell lung cancer: next generation sequencing detection, experimental validation, and prognostic value
Source: PubMed Central journal article supplement (PMC5593550; doi:10.18632/oncotarget.18603), 2017-06-22
Supplement: oncotarget-08-56143-s001.pdf [file oncotarget-08-56143-s001.pdf]

# MicroRNA profiling associated with non-small cell lung cancer: next generation sequencing detection, experimental validation, and prognostic value

## SUPPLEMENTARY MATERIALS

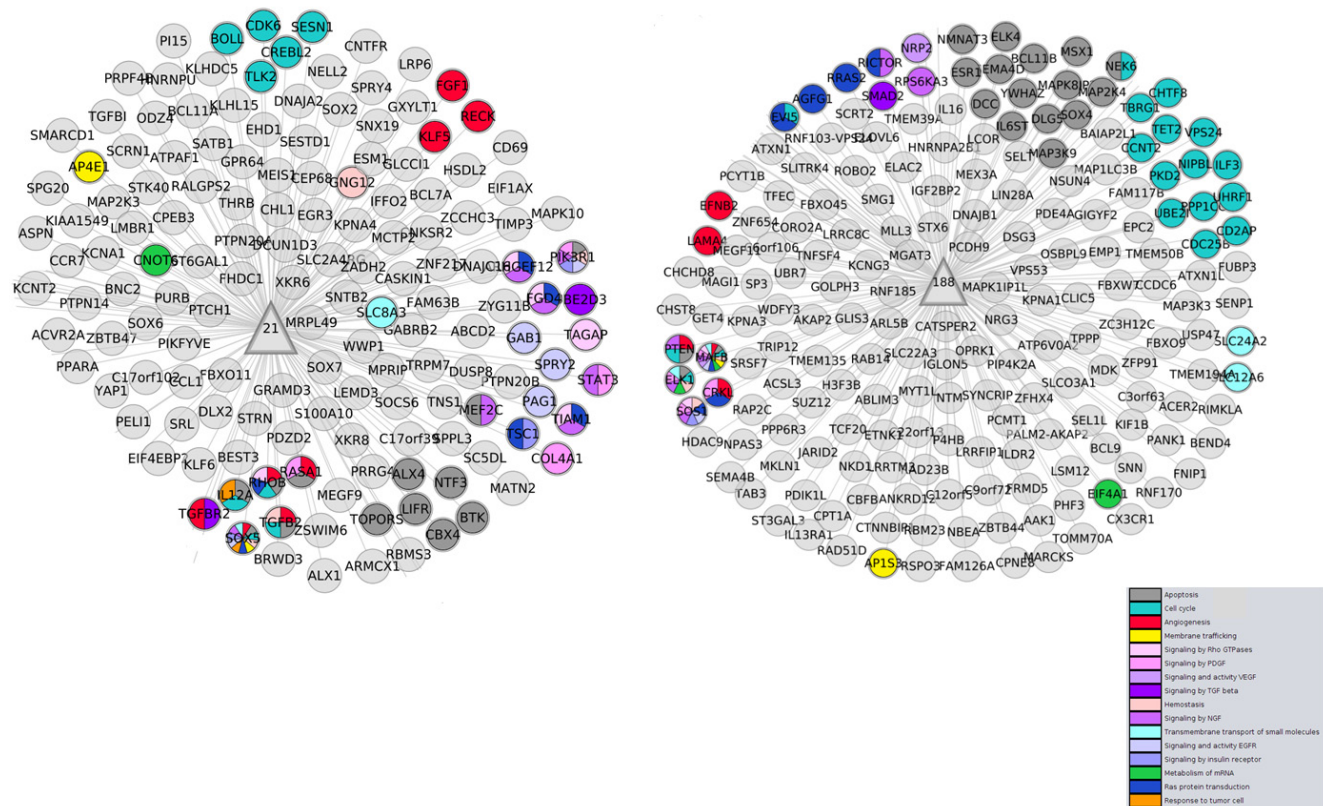

Supplementary Figure 1: Target genes enrichment for miR-21 and miR-188
